# Supplementary material for: Novel Insights on the Role of Epigenetics in Androgen Receptor’s Expression in Prostate Cancer
Source: MDPI journal article supplement (doi:10.3390/biom13101526), 2023-10-14
Supplement: s1 [file s1]

Supplementary Data

# Novel insights on the role of epigenetics in androgen receptor's expression in prostate cancer

Vânia Camilo <sup>1†</sup>, Mariana Brütt Pacheco <sup>1†</sup> and Filipa Moreira-Silva <sup>1</sup>; Gonçalo Outeiro-Pinho <sup>1</sup>; Vítor M. Gaspar <sup>2</sup>; João F. Mano <sup>2</sup>; C. Joana Marques <sup>3;4</sup>; Rui Henrique <sup>1;5;6</sup>; Carmen Jerónimo <sup>1;6\*</sup>

## Supplementary Figures

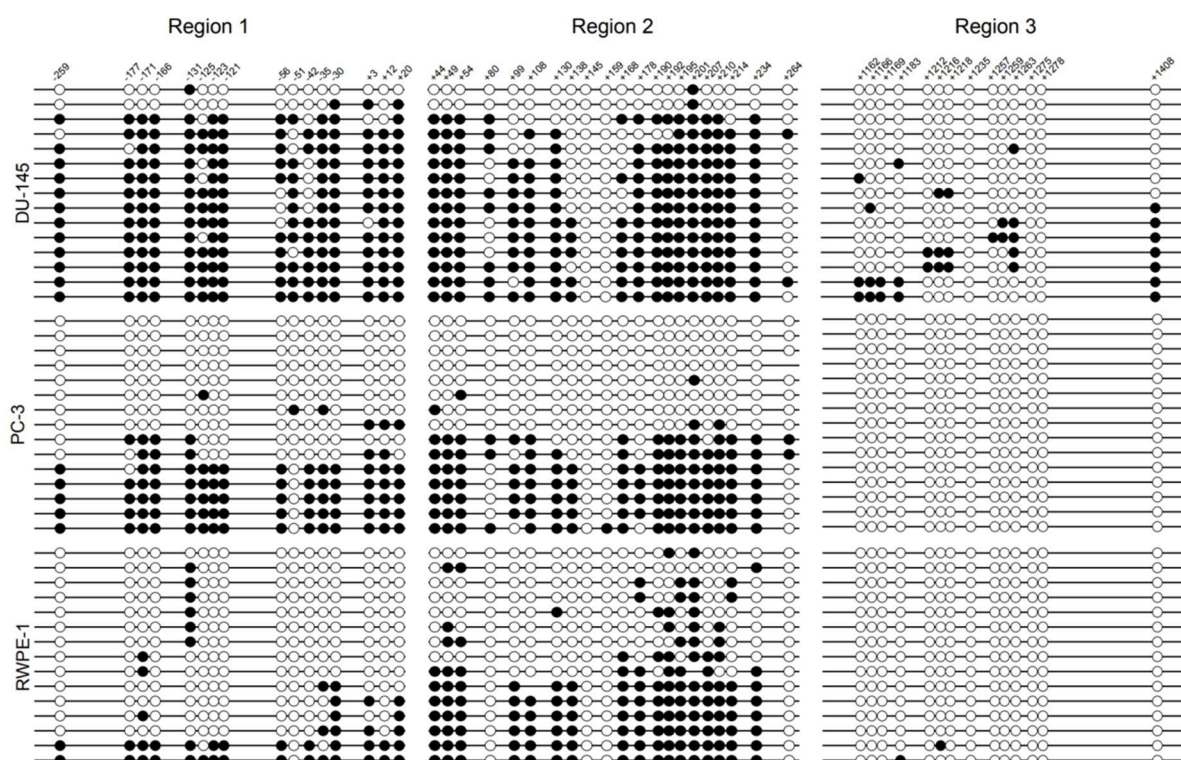

**Figure S1.** Specific CpG methylation status of *AR* regions 1 to 3 in WT prostate cell lines. DU-145 (upper), PC-3 (middle) and RWPE-1 (lower) cell lines' methylation was assessed in 15 independent clones. Each row represents one clone, and the presence or absence of methylation is represented by a black or white circle, respectively. The clones are ranked from top to bottom according to the number of methylated CpGs.

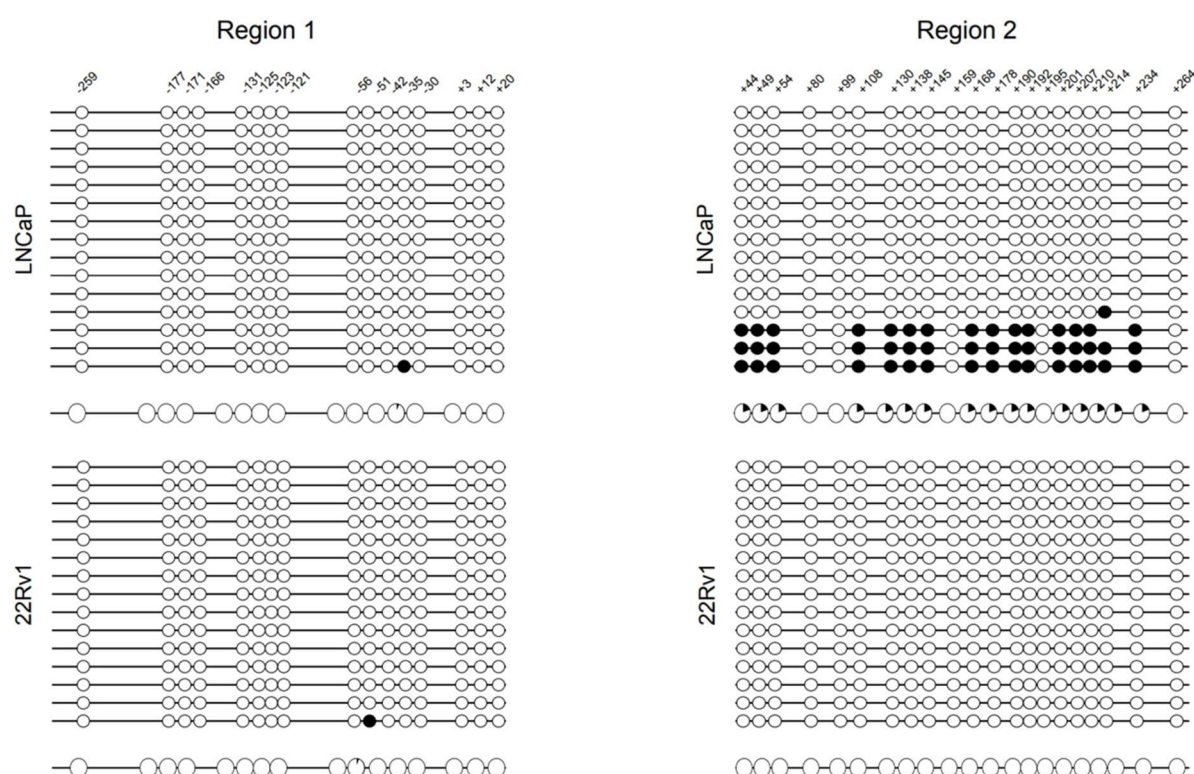

**Figure S2.** Specific CpG methylation status of *AR* regions 1 and 2 in AR positive PCa cell lines. LNCaP and 22Rv1 cell lines' methylation was assessed in 15 independent clones. Each row represents one clone, and the presence or absence of methylation is represented by a black or white circle, respectively. The clones are ranked from top to bottom according to the number of methylated CpGs. The mean percentage of methylation per region is displayed under the sequences of individual clones.

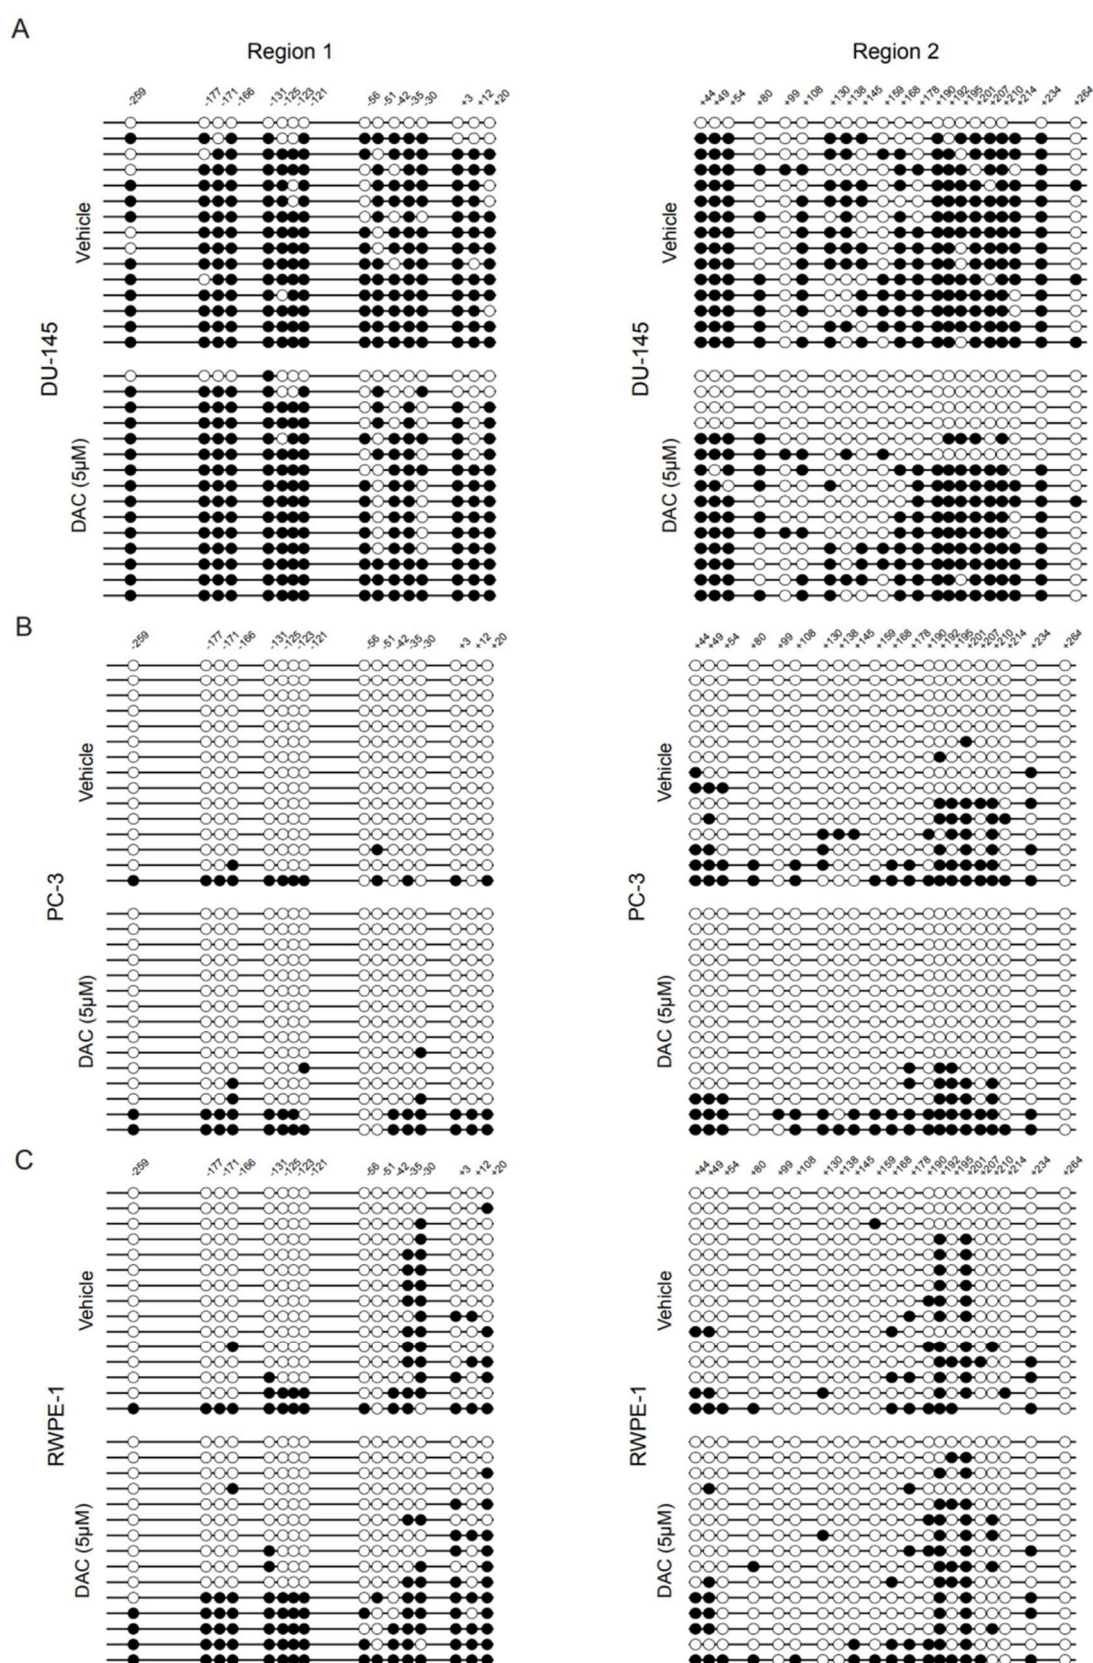

**Figure S3.** Specific CpG methylation status of AR regions 1 and 2 in prostate cell lines following treatment with DAC. DU-145 (A), PC-3 (B) and RWPE-1 (C) cell lines' methylation was assessed in 15 independent clones following exposure to DAC at 5 $\mu$ M or its respective vehicle control. Each row represents one clone, and the presence or absence of methylation is represented by a black or white



circle, respectively. The clones are ranked from top to bottom according to the number of methylated CpGs.

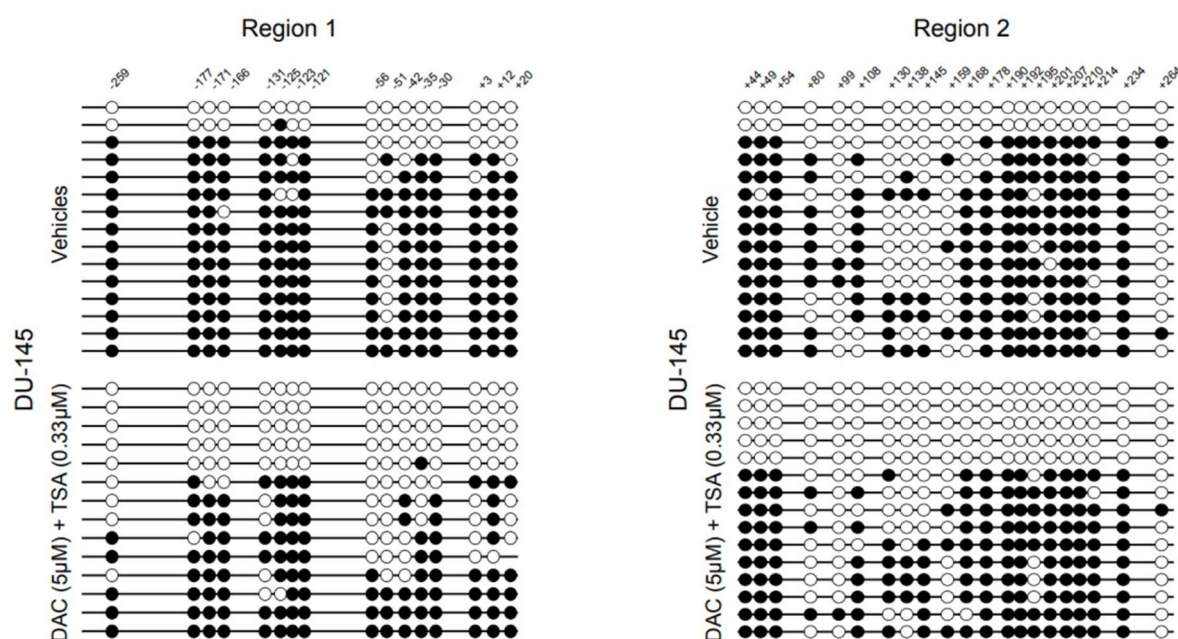

**Figure S4.** Specific CpG methylation status of AR regions 1 and 2 in DU-145 cells following combined treatment with DAC and TSA. DU-145 methylation was assessed in 14 or 15 independent clones following exposure to DAC at 5µM and TSA at 0.33µM or vehicle control, respectively. Each row represents one clone, and the presence or absence of methylation is represented by a black or white circle, respectively. The clones are ranked from top to bottom according to the number of methylated CpGs.

#### AR 1

GGAACCAAAATTTGGTGAAGTCTGGCCTCCAGGAAATCTGAGCCCTGGCGCTAAACCTTGG  
TTTAGGAAAGCAGGAGCTATTTCAGGAAGCAGGGGTCTCCAGGGCTAGAGCTAGCCTCTCCT  
GCCCTCGCCACGCTGCGCCAGCACTTGTTCCTCAAAGCCACTAGGCAGGCGTTAGCGCGCG  
GTGAGGGGAGGGGAGAAAAGGAAAGGGGAGGGGAGGGGAAAGGAGGTGGGAAGGCAAG  
GAGGCCGCGCCGTTGGGGGCGGACCCGACTCGCAAACTGTTGCATTGTCTCCACCTCCC  
AGCGCCCCCTCCGAGATCCCGGGGAGCCAGCTTGTCTGGGAGA

#### AR 3

GGAACCAAAATTTGGTGAAGTCTGGCCTCCAGGAAATCTGAGCCCTGGCGCTAAACCTTGG  
TTTAGGAAAGCAGGAGCTATTTCAGGAAGCAGGGGTCTCCAGGGCTAGAGCTAGCCTCTCCT  
GCCCTCGCCACGCTGCGCCAGCACTTGTTCCTCAAAGCCACTAGGCAGGCGTTAGCGCGCG  
GTGAGGGGAGGGGAGAAAAGGAAAGGGGAGGGGAGGGGAAAGGAGGTGGGAAGGCAAG  
GAGGCCGCGCCGTTGGGGGCGGACCCGACTCGCAAACTGTTGCATTGTCTCCACCTCCC  
AGCGCCCCCTCCGAGATCCCGGGGAGCCAGCTTGTCTGGGAGA

#### AR 2

GGAACCAAAATTTGGTGAAGTCTGGCCTCCAGGAAATCTGAGCCCTGGCGCTAAACCTTGG  
TTTAGGAAAGCAGGAGCTATTTCAGGAAGCAGGGGTCTCCAGGGCTAGAGCTAGCCTCTCCT  
GCCCTCGCCACGCTGCGCCAGCACTTGTTCCTCAAAGCCACTAGGCAGGCGTTAGCGCGCG  
GTGAGGGGAGGGGAGAAAAGGAAAGGGGAGGGGAGGGGAAAGGAGGTGGGAAGGCAAG  
GAGGCCGCGCCGTTGGGGGCGGACCCGACTCGCAAACTGTTGCATTGTCTCCACCTCCC  
AGCGCCCCCTCCGAGATCCCGGGGAGCCAGCTTGTCTGGGAGA

#### AR 4

GGAACCAAAATTTGGTGAAGTCTGGCCTCCAGGAAATCTGAGCCCTGGCGCTAAACCTTGG  
TTTAGGAAAGCAGGAGCTATTTCAGGAAGCAGGGGTCTCCAGGGCTAGAGCTAGCCTCTCCT  
GCCCTCGCCACGCTGCGCCAGCACTTGTTCCTCAAAGCCACTAGGCAGGCGTTAGCGCGCG  
GTGAGGGGAGGGGAGAAAAGGAAAGGGGAGGGGAGGGGAAAGGAGGTGGGAAGGCAAG  
GAGGCCGCGCCGTTGGGGGCGGACCCGACTCGCAAACTGTTGCATTGTCTCCACCTCCC  
AGCGCCCCCTCCGAGATCCCGGGGAGCCAGCTTGTCTGGGAGA

**Figure S5.** Localization of AR1-4 primers, within AR region 1, used in Chip-PCR analysis. Primers AR1, AR2, AR3 and AR4 localization within AR region 1.

Experiment #1, #2 and #3 – DAC treatment for 3 days

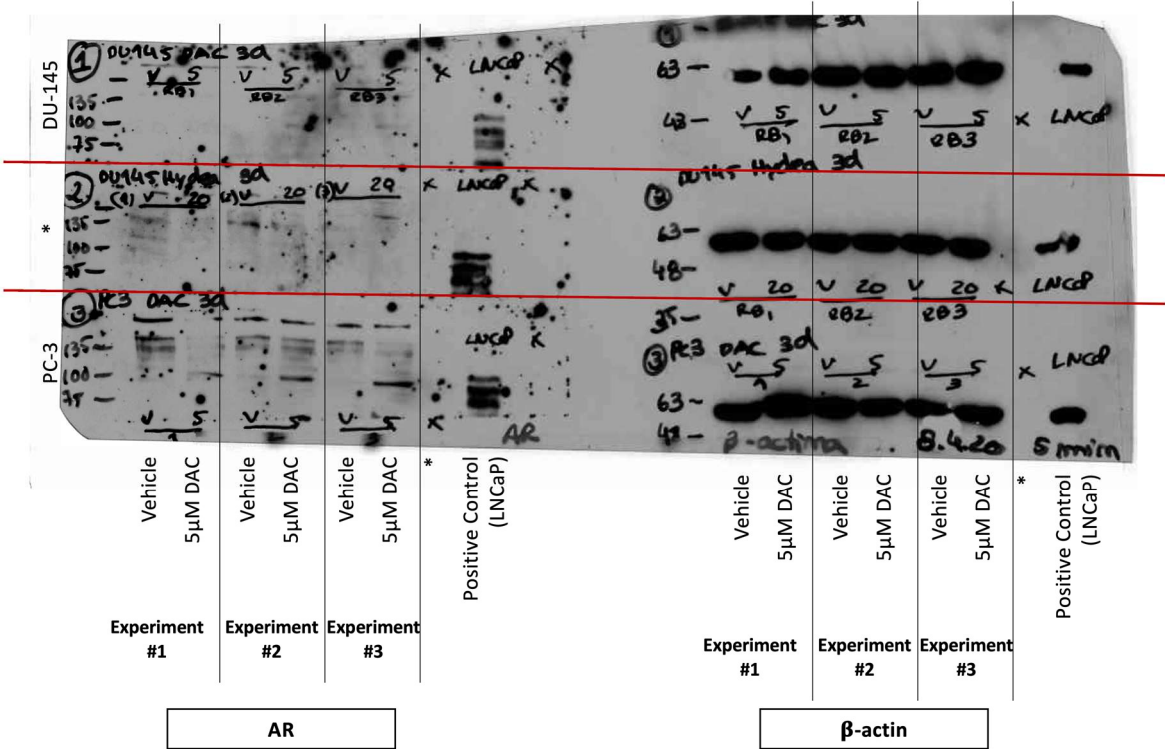

Figure S6. Original Western Blots of the experiments used for the representation of the proteins presented in Figure 2D. The symbol \* represents lanes and experiments that were not used for the representation of the proteins presented in Figure 2D.

## Experiment #1, #2, #3 and #4 – DAC and TSA treatment for 3 days, alone and in combination

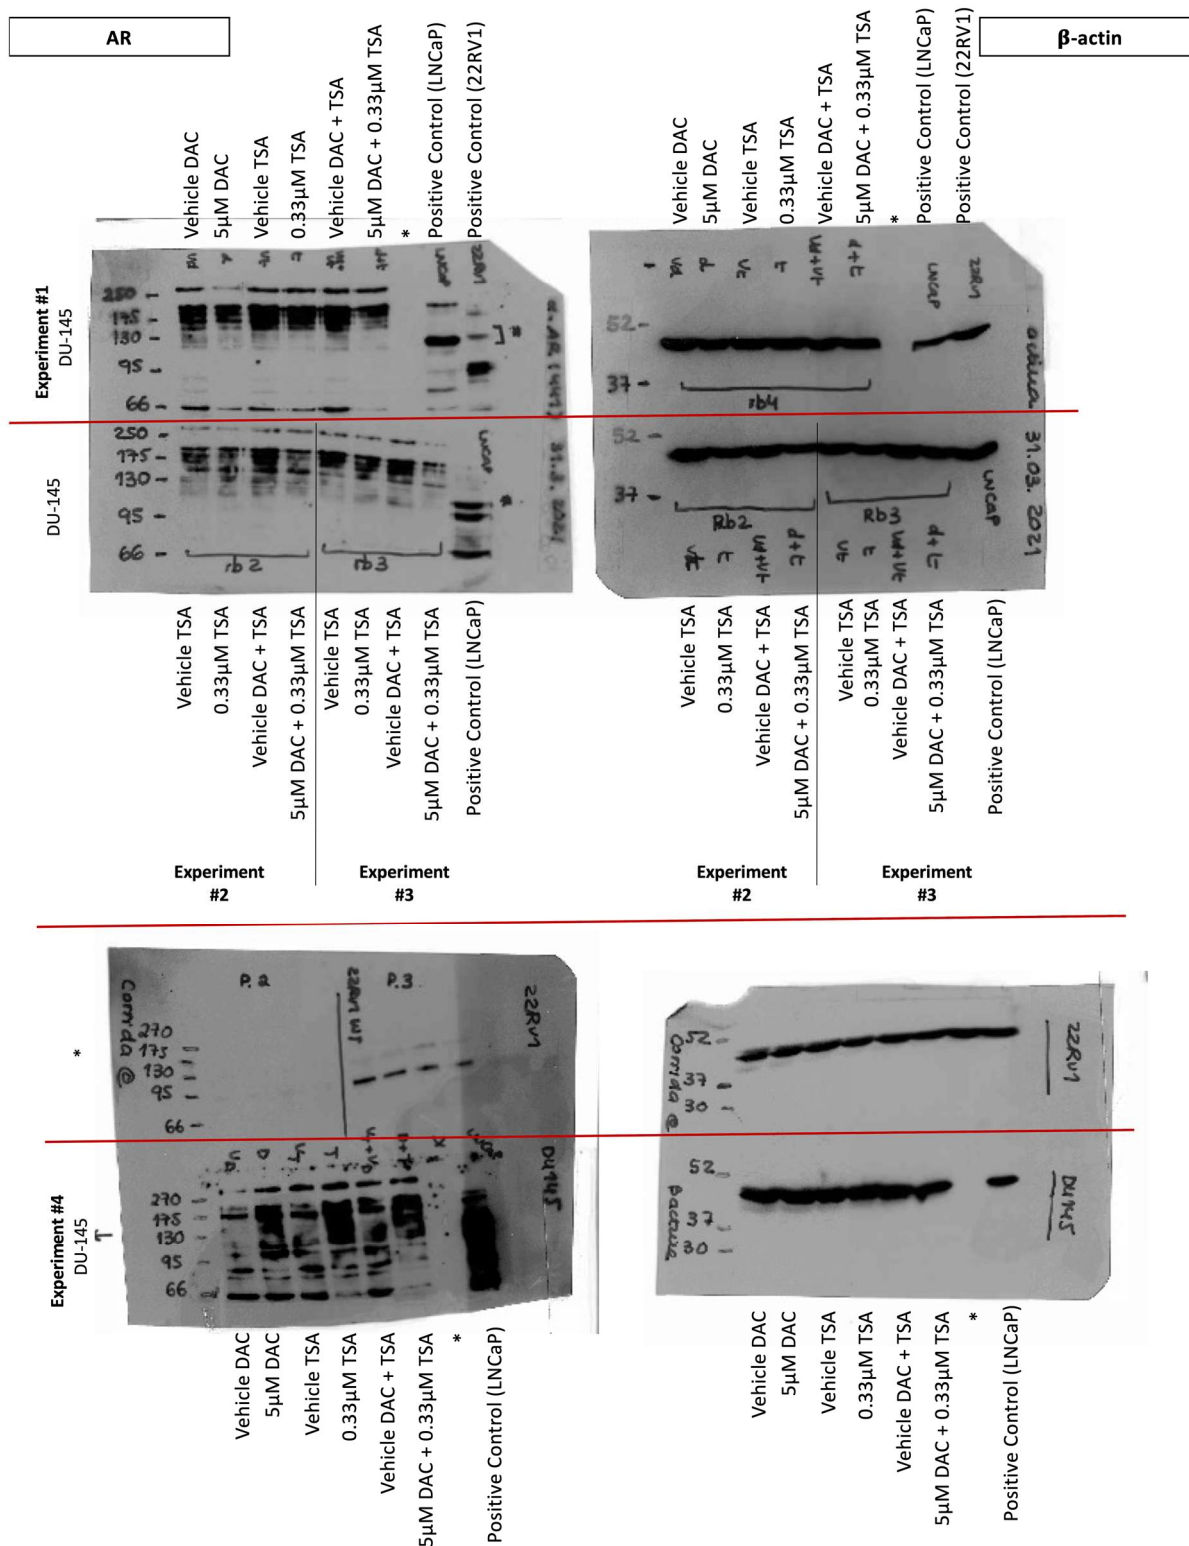

**Figure S7.** Original Western Blots of the experiments used for the representation of the proteins presented in Figure 3C. The symbol \* represents lanes and experiments that were not used for the representation of the proteins presented in Figure 3C.

## Supplementary Tables

**Table S1.** List of antibodies used in this study.

| Antibody       | Species     | Dilution | Blocking      | Clone  | Supplier           | Positive Control | Expected MW |
|----------------|-------------|----------|---------------|--------|--------------------|------------------|-------------|
| AR             | Mouse (mAb) | 1:200    | 5% NFDM/TBS-T | AR-441 | Sigma Aldrich, USA | LNCaP            | 110kDa      |
| $\beta$ -actin | Mouse (mAb) | 1:10,000 | 5% NFDM/TBS-T | A1978  | Sigma Aldrich, USA | n.a              | 42kDa       |

mAb – monoclonal antibody; NFDM – non-fat dry milk; TBS-T- Tris Buffer Saline, 0.1% Tween-20; n.a – not applicable; MW – molecular weight.

**Table S2.** List of primers used in this study.

| Gene              | Primer Forward (5'-3')          | Primer Rev (5'-3')             | T <sub>annealing</sub> |
|-------------------|---------------------------------|--------------------------------|------------------------|
| AR_region 1 (BSP) | GGAATTAAATTTGGTGAGTGT           | TCTCCCAACAACTAACTCC            | 60°C                   |
| AR_region 2 (BSP) | GGAGTTAGTTTGTGTTGGGAGA          | CCTACCAAACACTTTCCTTAC          | 60°C                   |
| AR_region 3 (BSP) | AAGTTTAAGGATGGAAGTGATGTT        | TTACTATTCCTCATCCAGGACC         | 60°C                   |
| miR-130a (qMSP)   | ATAAATTTTGTCGGGGAGAGC           | AATACCCCGATCAACGAAAA           | 64°C                   |
| CCND2 (qMSP)      | TTTGATTTAAGGATGCGTTAGAGT<br>ACG | ACTTTCTCCCTAAAAACCGACTAC<br>G  | 62°C                   |
| RASSF1A(qMSP)     | GGGTTTTGCGAGAGCGCG              | GCTAACAAACGCGACCG              | 60°C                   |
| ACTB (qMSP)       | TGGTGATGGAGGAGTTTAGTAAG<br>T    | ACCAATAAAACCTACTCCTCCCTT<br>AA | 60°C                   |
| AR 1 (ChIP)       | GGAGCTATTCAGGAAGCAGGG           | GCACTTGTTTCTCCAAAGCCA          | 60°C                   |
| AR 2 (ChIP)       | CTCCAAAGCCACTAGGCAGG            | TGTTGCATTTGCTCTCCACC           | 60°C                   |
| AR 3 (ChIP)       | AAATTTGGTGAGTGCTGGCCT           | TATTCAGGAAGCAGGGGTCCT          | 60°C                   |
| AR 4 (ChIP)       | TGTTGCATTTGCTCTCCACCT           | AGGCGACAGAGGGAAAAAGG           | 60°C                   |

BSP- Bisulfite Sequencing Primer; qMSP- Quantative Methylation Specific Primer; ChIP – Chromatin Immunoprecipitation
